# Supplementary material
Source: PubMed Central journal article supplement (PMC4095771)
Supplement: NIHMS592100-supplement-01.pdf [file NIHMS592100-supplement-01.pdf]

## Supplementary Data

### Supplementary Materials and Methods

#### Western Blot

Total protein extract was prepared by using RIPA lysis buffer plus protease inhibitors. 15  $\mu$ g of each protein lysate was resolved on a 4-12% Bis-Tris NuPAGE gel (Invitrogen) and transferred to PVDF and probed with antibodies against Dicer, Drosha and  $\beta$ -actin (Abcam, Inc.) Proteins were visualized with ECF (Amersham Biosciences) and detected by Typhoon 9400 imager (GE Healthcare).

#### miRNA microarray

1  $\mu$ g of MicroRNA-enriched small RNA samples were prepared from Dicer or Drosha-knockdown NB cell lines using the mirVana™ miRNA Isolation Kit (Ambion) and labeled with DyLight™ DY-547(negative control, sh-Luc) or DyLight™ DY-647 (sh-Dicer or sh-Drosha) using T4 RNA ligase. The labeled samples were pooled and hybridized to miRNA OneArray (Phalanx Biotech, Hsing-Chu, Taiwan). The miRNA microarray contains 1,040 unique miRNA probes in triplicate, including 838 human miRNA (Sanger miRBase v11.0). Processed slides were scanned by using Axon GenePix 4000B scanner with laser set to 532nm and 635nm and a scan resolution of 10  $\mu$ m. Signal intensities for each spot were calculated by subtracting local background from total

intensities and normalization were done by using U6 as internal control. Normalized data were hierarchically clustered by gene and are plotted as heat map.

## **Supplementary Results**

### **PNN result validation**

In further analysis, we assigned the NB patients into two data sets: a Training Set comprised of the first 38 patients diagnosed with NB, and a Testing Set containing the later-diagnosed 28 patients. We trained a new PNN to learn from the 15 biomarkers and clinical survival information (dead/alive status) of the NB patients in the Training Set. Then with the survival information removed from the Testing Set, we used the newly trained PNN to automatically classify each patient of the Testing Set as belonging to alive or dead groups. The accuracy of prediction for patient survival status in the Testing set was 25 correct out of 28(89%). We then performed another Kaplan-Meier survival analysis on these two patient groups (Supplementary Figure S4). The figure shows a clear distinction between the groups; thus, given a patient's 15 biomarkers, with no survival information known, one can distinguish NB patients who will survive from those who will die. These findings imply that a combination of these 15 biomarkers may serve as a powerful predictor of NB clinical outcome.

**Supplementary Table S1**  
**Summary of clinical characteristics of neuroblastoma patients**

| Variable                                | Cases No. (%)<br>(n=66) |
|-----------------------------------------|-------------------------|
| <b>INSS stage</b>                       |                         |
| Stage 1                                 | 7 (11)                  |
| Stage 2                                 | 18 (27)                 |
| Stage 3                                 | 12 (18)                 |
| Stage 4                                 | 22 (33)                 |
| Stage 4S                                | 7 (11)                  |
| <b>MYCN</b>                             |                         |
| Amplification                           | 13 (20)                 |
| Non Amplification                       | 53 (80)                 |
| <b>Risk</b>                             |                         |
| Low                                     | 31 (47)                 |
| Intermediate                            | 10 (15)                 |
| High                                    | 25 (38)                 |
| <b>Survival</b>                         |                         |
| Alive                                   | 49 (74)                 |
| Dead                                    | 17 (26)                 |
| <b>Event</b>                            |                         |
| no event                                | 45 (68)                 |
| event                                   | 21 (32)                 |
| <b>Age at diagnosis</b>                 |                         |
| <1.5 year                               | 43 (65)                 |
| ≥ 1.5 year, <5 year                     | 18 (27)                 |
| ≥ 5 year                                | 5 (8)                   |
| <b>Shimada histology</b>                |                         |
| Favorable                               | 29 (44)                 |
| Unfavorable                             | 18 (27)                 |
| Missing                                 | 19 (29)                 |
| <b>Sex</b>                              |                         |
| Male                                    | 23 (35)                 |
| Female                                  | 36 (55)                 |
| missing                                 | 7 (10)                  |
| <b>Sample source</b>                    |                         |
| CCG (Children's Oncology Group)         | 35 (53)                 |
| POG (Pediatric Oncology Group)          | 21 (32)                 |
| CHTN (Cooperative Human Tissue Network) | 10 (15)                 |

**Supplementary Table S2****miRNAs differentially expressed in comparison of clinically defined groups**

| <b>Group</b>                                                    | <b>no. of miRNAs</b> |
|-----------------------------------------------------------------|----------------------|
| <b>Stage classification</b>                                     |                      |
| stage 1 (n=7) vs. 2 (n=18) vs.3 (n=12) vs. 4s (n=7) vs.4 (n=22) | 33                   |
| stage 1~3 and 4s (n=44) vs. 4 (n=22)                            | 78                   |
| stage 1 (n=7) vs. 2 (n=18) vs.3 (n=12) vs. 4s (n=7)             | 0 <sup>a</sup>       |
| stage 4 (n=22) vs. 4s (n=7)                                     | 33 <sup>b</sup>      |
| <b>Risk classification</b>                                      |                      |
| Low (n=31) vs. Intermediate (n=10) vs. High (n=25)              | 53                   |
| Low and Intermediate (n=10) vs. High (n=25)                     | 67                   |
| Low (n=31) vs. High (n=25)                                      | 59                   |
| Low (n=31) vs. Intermediate (n=25)                              | 0 <sup>a</sup>       |
| <b>MYCN classification</b>                                      |                      |
| all stage: NA (n=53) vs. Amp (n=13)                             | 14                   |
| stage 4: NA (n=13) vs. Amp (n=9)                                | 5 <sup>b</sup>       |
| <b>Survival classification</b>                                  |                      |
| survival (n=49) vs. dead (n=17)                                 | 40                   |
| stage 4: survival (n=9) vs. dead (n=13)                         | 1 <sup>a</sup>       |
| <b>Event classification</b>                                     |                      |
| no event (n=45) vs. event (n=21)                                | 21                   |
| stage 4: no event (n=8) vs. event (n=14)                        | 1 <sup>a</sup>       |
| <b>Age at diagnosis classification, yr</b>                      |                      |
| <1.0 (n=32) vs. 1~5 (n=28) vs. <5 (n=5)                         | 3 <sup>a</sup>       |

---

All using 1-way ANOVA analysis,  $p < 0.001$ ; except <sup>a</sup>:  $p < 0.05$ , <sup>b</sup>:  $p < 0.01$

NA, not amplification

Supplementary Table S3

27 miRNAs differentially expressed in high- vs. low-risk NB

|    | miRNA                 | location         | fold<br>change* | p-value <sup>a</sup> | PAM score <sup>b</sup> |                  |
|----|-----------------------|------------------|-----------------|----------------------|------------------------|------------------|
|    |                       |                  |                 |                      | H-risk<br>(n=10)       | L-risk<br>(n=31) |
| 1  | <b>hsa-miR-149</b>    | 2q37.3           | -3.8            | 1.66E-05             | -0.0918                | 0                |
| 2  | <b>hsa-miR-129</b>    | 7q32.1 / 11p11.2 | -8.5            | 3.44E-05             | -0.0892                | 0.0194           |
| 3  | <b>hsa-miR-27b</b>    | 9q22.32          | -5.7            | 1.66E-05             | -0.0835                | 0.0074           |
| 4  | hsa-miR-23b           | 9q22.1           | -4.4            | 1.66E-05             | -0.0828                | 0                |
| 5  | <b>hsa-miR-190</b>    | 15q22.2          | -3.8            | 1.05E-04             | -0.0822                | 0                |
| 6  | hsa-miR-128a          | 2q21             | -4.8            | 1.66E-05             | -0.0746                | 0                |
| 7  | hsa-miR-15a           | 13q14            | -6.5            | 3.56E-05             | -0.0661                | 0                |
| 8  | hsa-miR-148a          | 7p15.2           | -5.3            | 1.53E-04             | -0.0656                | 0.0364           |
| 9  | <b>hsa-miR-137</b>    | 1p21.3           | -5.1            | 1.16E-04             | -0.0616                | 0                |
| 10 | <b>hsa-miR-30c</b>    | 1p34.2 / 6q13    | -4.3            | 1.66E-05             | -0.0514                | 0                |
| 11 | hsa-miR-197           | 1p13             | -4.1            | 2.13E-05             | -0.0418                | 0                |
| 12 | hsa-miR-195           | 17p13            | -4.4            | 2.29E-04             | -0.0297                | 0                |
| 13 | hsa-miR-26b           | 2q35             | -4.6            | 1.66E-05             | -0.0273                | 0                |
| 14 | hsa-miR-21            | 17q23.2          | -3.7            | 5.52E-05             | -0.0267                | 0                |
| 15 | <b>hsa-miR-30b</b>    | 8q24.22          | -3.4            | 1.66E-05             | -0.0264                | 0                |
| 16 | hsa-miR-135a          | 3p21.1 / 12q23.1 | -4.0            | 2.40E-04             | -0.0259                | 0                |
| 17 | hsa-miR-126           | 9q34.3           | -4.2            | 6.44E-05             | -0.0215                | 0.014            |
| 18 | hsa-miR-95            | 4p16             | -3.7            | 8.63E-05             | -0.0206                | 0                |
| 19 | hsa-miR-142-5p        | 17q23            | -3.8            | 8.26E-04             | 0                      | 0.0201           |
| 20 | hsa-miR-128b          | 3p22             | -4.0            | 1.39E-04             | -0.0171                | 0                |
| 21 | hsa-miR-98            | xp11.2           | -4.7            | 8.69E-05             | -0.0137                | 0                |
| 22 | hsa-miR-142-3p        | 17q23            | -4.4            | 8.26E-04             | 0                      | 0.0131           |
| 23 | hsa-miR-340           | 5q35.3           | -2.5            | 3.44E-05             | -0.0079                | 0                |
| 24 | <b>hsa-miR-30e</b>    | 1p34.2           | -4.6            | 1.94E-05             | -0.0071                | 0                |
| 25 | <b>hsa-miR-331</b>    | 12q22            | -3.0            | 3.44E-05             | -0.004                 | 0                |
| 26 | hsa-miR-140           | 16q22.1          | -2.9            | 3.56E-05             | -0.0032                | 0                |
| 27 | <b>hsa-miR-324-5p</b> | 17p13.1          | -3.6            | 1.87E-04             | -0.0022                | 0                |

\* fold change in high-risk compared to low-risk group

<sup>a</sup> by ANOVA (Welch *t* test in the Genespring software package)

<sup>b</sup> Centroid scores for the two classes of the PAM

**Bold**, miRNAs also obtained in Chen and Stallings group

**Supplementary Table S4 Cox regression analyses of the various clinical factors with *event-free survival* in NB patients (N=65)**

| <b>Variables</b>             | <b>HR (95% CI)</b>    | <b>Favorable/Unfavorable</b>    | <b>p-value</b>    |
|------------------------------|-----------------------|---------------------------------|-------------------|
| <b>Univariate analysis</b>   |                       |                                 |                   |
| Stage                        | 4.38 ( 1.76 , 10.88 ) | 1, 2, 3, 4S/4                   | <b>0.0015</b>     |
| Myc                          | 7.34 ( 3.07 , 17.57 ) | Non-amplification/Amplification | <b>&lt;0.0001</b> |
| Gender                       | 1.08 ( 0.95 , 1.24 )  | Female/Male                     | 0.2419            |
| Risk                         | 8.18 ( 2.74 , 24.42 ) | Low, Middle/High                | <b>0.0002</b>     |
| Age at diagnosis_1.5         | 4.97 ( 1.99 , 12.37 ) | <1.5 year/ $\geq$ 1.5 year      | <b>0.0006</b>     |
| Dicer                        | 4.28 ( 1.76 , 10.40 ) | High/Low                        | <b>0.0013</b>     |
| Drosha                       | 6.49 ( 1.91 , 22.10 ) | High/Low                        | <b>0.0028</b>     |
| <b>Multivariate analysis</b> |                       |                                 |                   |
| Stage                        | 1.83 ( 0.67 , 4.99 )  | 1, 2, 3, 4S/4                   | 0.2361            |
| Myc                          | 2.78 ( 1.01 , 7.66 )  | Non-amplification/Amplification | <b>0.0481</b>     |
| Age at diagnosis_1.5         | 2.00 ( 0.65 , 6.17 )  | <1.5 year/ $\geq$ 1.5 year      | 0.2273            |
| Dicer                        | 1.34 ( 0.46 , 3.93 )  | High/Low                        | 0.5898            |
| Drosha                       | 2.66 ( 0.63 , 11.23 ) | High/Low                        | 0.1840            |

**Cox regression analyses of the various clinical factors with *overall survival* in NB patients (N=65)**

| <b>Variables</b>             | <b>HR (95% CI)</b>      | <b>Favorable/Unfavorable</b>    | <b>p-value</b>    |
|------------------------------|-------------------------|---------------------------------|-------------------|
| <b>Univariate analysis</b>   |                         |                                 |                   |
| Stage                        | 7.71 ( 2.50 , 23.78 )   | 1, 2, 3, 4S/4                   | <b>0.0004</b>     |
| Myc                          | 12.82 ( 4.67 , 35.23 )  | Non-amplification/Amplification | <b>&lt;0.0001</b> |
| Gender                       | 1.12 ( 0.97 , 1.29 )    | Female/Male                     | 0.1183            |
| Risk                         | 34.14 ( 4.51 , 258.65 ) | Low, Middle/High                | <b>0.0006</b>     |
| Age at diagnosis_1.5         | 5.67 ( 1.99 , 16.16 )   | <1.5 year/ $\geq$ 1.5 year      | <b>0.0012</b>     |
| Dicer                        | 3.37 ( 1.28 , 8.90 )    | High/Low                        | <b>0.0142</b>     |
| Drosha                       | 4.66 ( 1.34 , 16.26 )   | High/Low                        | <b>0.0158</b>     |
| <b>Multivariate analysis</b> |                         |                                 |                   |
| Stage                        | 3.82 ( 1.10 , 13.30 )   | 1, 2, 3, 4S/4                   | <b>0.035</b>      |
| Myc                          | 6.04 ( 1.61 , 22.63 )   | Non-amplification/Amplification | <b>0.0077</b>     |
| Age at diagnosis_1.5         | 1.72 ( 0.47 , 6.38 )    | <1.5 year/ $\geq$ 1.5 year      | 0.4155            |
| Dicer                        | 1.05 ( 0.32 , 3.45 )    | High/Low                        | 0.9365            |
| Drosha_                      | 1.01 ( 0.20 , 5.23 )    | High/Low                        | 0.9881            |

HR: Hazard Ratio; 95% CI, 95% confidence interval

**Supplementary Table S5.**

(A)

|           | miR-29a | miR-30c | miR-30e | miR-95 | miR-128a | miR-128b | miR-135a | miR-135b | miR-137 | miR-138 | miR-148a | miR-195 | Dxage   | Dicer | Drosha |
|-----------|---------|---------|---------|--------|----------|----------|----------|----------|---------|---------|----------|---------|---------|-------|--------|
| Pattern A | 1.85    | 1.56    | 1.13    | 1.24   | 1.48     | 2.3      | 1.28     | 2.53     | 1.19    | 2.02    | 3.13     | 1.46    | 662.08  | -4.05 | -5.13  |
| Pattern B | 1.9     | 0.36    | 0.44    | 0.44   | 0.33     | 0.46     | 0.66     | 9.38     | 0.36    | 1.29    | 0.44     | 0.62    | 1045.22 | -5.46 | -6.23  |
| Pattern C | 9.07    | 4.08    | 6.38    | 5.9    | 6.04     | 5.88     | 7.58     | 18.1     | 5.64    | 11.07   | 4.6      | 7.22    | 664.38  | -3.52 | -5.24  |
| Pattern D | 2.77    | 3.65    | 2.19    | 2.79   | 3        | 4.83     | 5.82     | 12.59    | 2.7     | 2.51    | 4.82     | 3.33    | 216.43  | -2.48 | -3.82  |

(B)

| PNN pattern     | Dead |              | Event |              | MYCN-amp |              | Risk |     |   |     |    |     |
|-----------------|------|--------------|-------|--------------|----------|--------------|------|-----|---|-----|----|-----|
|                 | No.  | % of pattern | No.   | % of pattern | No.      | % of pattern | H    | M   | L | No. | %  | No. |
| <b>A (n=19)</b> | 14   | 74%          | 15    | 79%          | 9        | 47%          | 18   | 95% | 0 | 0%  | 1  | 5%  |
| <b>B (n=25)</b> | 3    | 12%          | 5     | 20%          | 4        | 16%          | 6    | 24% | 5 | 20% | 14 | 56% |
| <b>C (n=13)</b> | 0    | 0%           | 1     | 8%           | 0        | 0%           | 0    | 0%  | 2 | 15% | 11 | 85% |
| <b>D (n=9)</b>  | 0    | 0%           | 0     | 0%           | 0        | 0%           | 1    | 11% | 3 | 33% | 5  | 56% |

**The 15 biomarkers can delineate clinical risk groups and refine risk assessment in NB.**

(A), Based on PNN analysis, 15 biomarkers including 12 miRNAs, Dicer, Drosha and age at diagnosis (Dxage), were self-organized into four cluster patterns. (B) Lower table shows the distribution of patient characteristics for each of the four PNN patterns.

**Supplementary Table S6** Cox regression analysis of the variables associated with event-free survival in existing NB microarray data sets (E-TABM-38 and E-MTAB-16)

*all NB patients (n=251)*

| <b>Variables</b>           | <b>HR (95% CI)</b>   | <b>Favorable/Unfavorable</b> | <b>p-value</b>   |
|----------------------------|----------------------|------------------------------|------------------|
| <b>Univariate analysis</b> |                      |                              |                  |
| <b>In E-TABM-38</b>        |                      |                              |                  |
| Stage                      | 2.99 ( 1.73 , 5.17 ) | 1, 2, 3, 4S/4                | <b>&lt;0.001</b> |
| MYCN                       | 2.32 ( 1.31 , 4.08 ) | Non/Amplified                | <b>0.004</b>     |
| Gender                     | 0.68 ( 0.43 , 1.09 ) | Female/Male                  | 0.113            |
| Age at diagnosis_1.5       | 1.61 ( 0.90 , 2.87 ) | <1.5 year/ $\geq$ 1.5 year   | 0.110            |
| Dicer                      | 1.24 ( 0.76 , 2.01 ) | High/Low                     | 0.386            |
| <b>In E-MTAB-16</b>        |                      |                              |                  |
| Dicer                      | 1.29 ( 0.81 , 2.40 ) | High/Low                     | 0.287            |

*NB patients without MYCN amplification (n=218)*

| <b>Variables</b>           | <b>HR (95% CI)</b>   | <b>Favorable/Unfavorable</b> | <b>p-value</b> |
|----------------------------|----------------------|------------------------------|----------------|
| <b>Univariate analysis</b> |                      |                              |                |
| <b>In E-TABM-38</b>        |                      |                              |                |
| Stage                      | 3.01 ( 1.59 , 5.69 ) | 1, 2, 3, 4S/4                | <b>0.001</b>   |
| Gender                     | 0.60 ( 0.34 , 1.05 ) | Female/Male                  | 0.072          |
| Age at diagnosis_1.5       | 2.19 ( 1.15 , 4.14 ) | <1.5 year/ $\geq$ 1.5 year   | <b>0.016</b>   |
| Dicer                      | 1.55 ( 0.85 , 2.82 ) | High/Low                     | 0.149          |



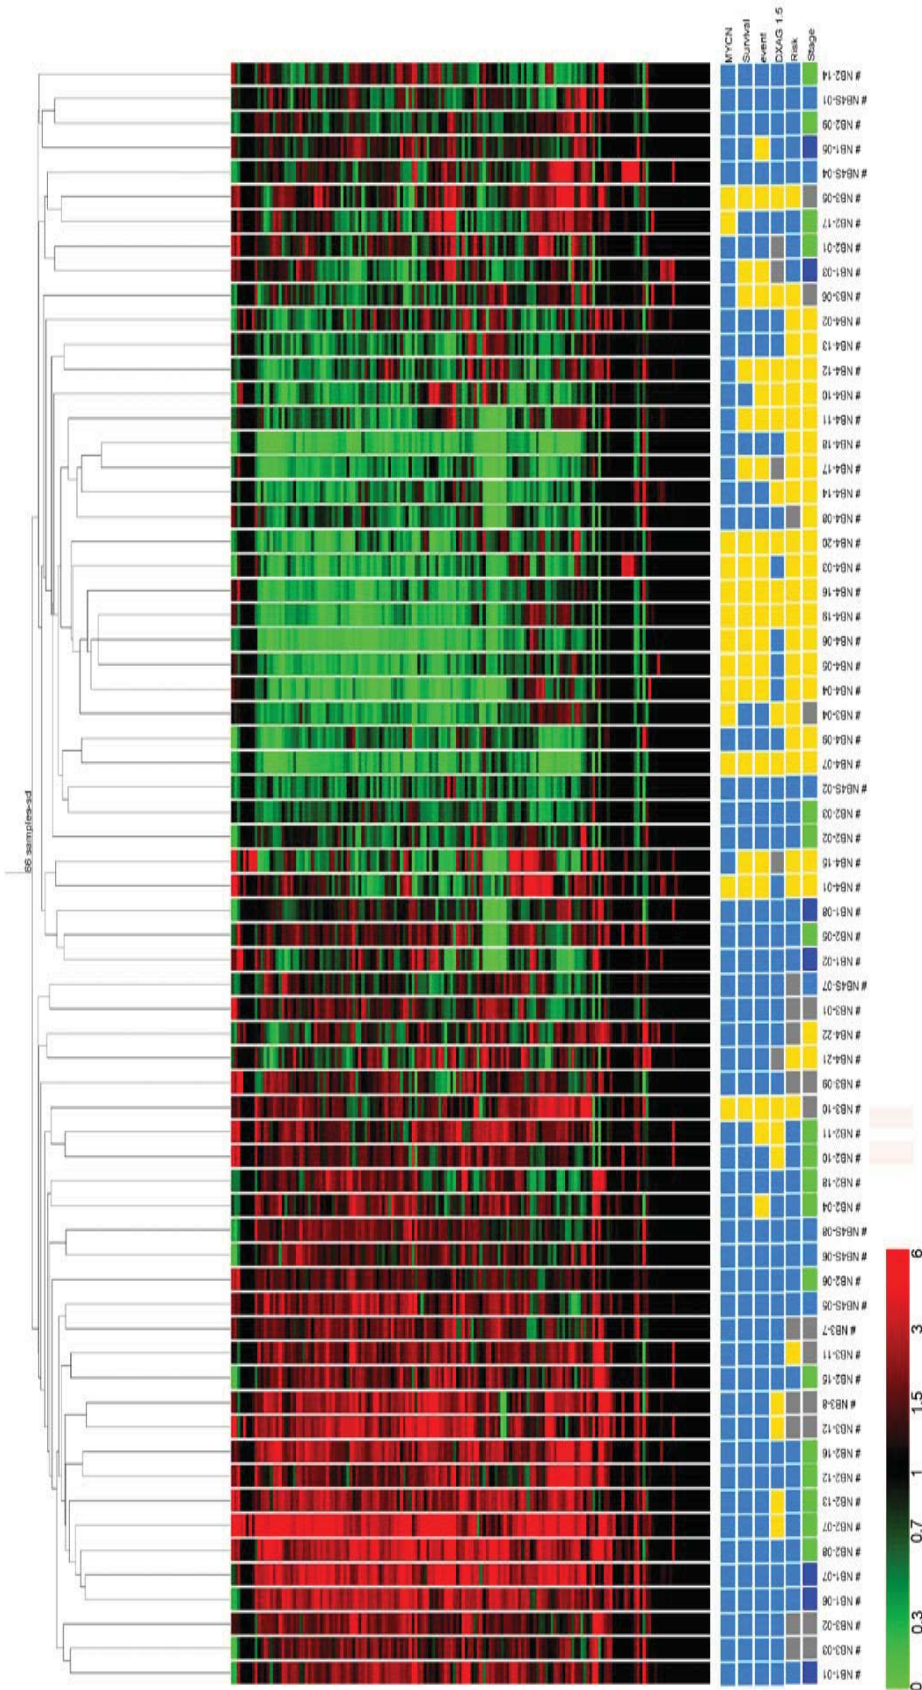

**Supplementary Figure S1. Hierarchical clustering of 162 miRNAs expression profile in 66 neuroblastoma samples by using Standard Correlation as measure of similarity.** Samples are shown in columns and miRNAs in rows. Color scale represents expression level relative to mean expression of a miRNA across all samples (red: high expression, green: low expression). Clinical characteristics: MYCN amplified, dead, event, age at diagnosis< 1.5-5 year and high-risk group are shown in yellow; MYCN not amplified, alive, no event, age at diagnosis > 5 year and low-risk are shown in blue; age at diagnosis > 5 year, intermediated-risk group are shown in grey. NB samples were coded as #NBX-01, NBX-02, etc., where X refers to INSS stage.

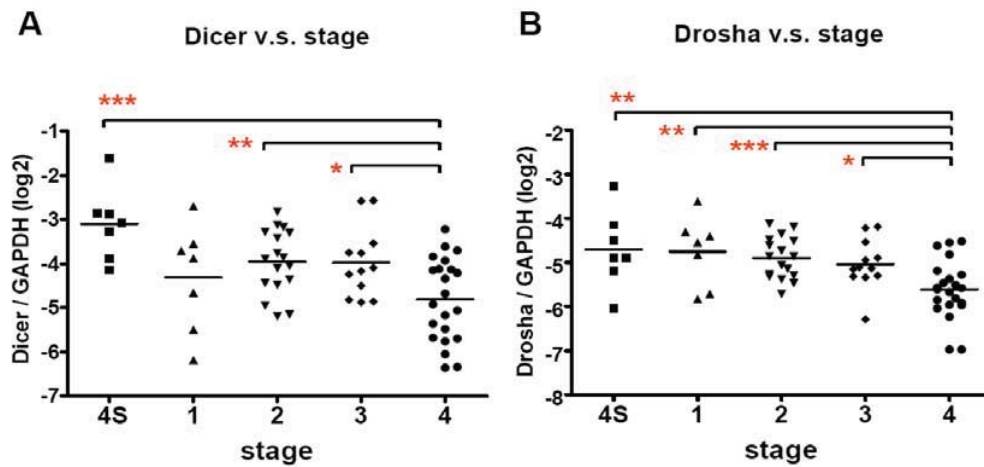

**Supplementary Figure S2. Expression of Dicer and Drosha are significantly lower in stage 4 NB than other stages.** Expression of Dicer (A) and Drosha (B) are determined by qRT-PCR in samples from each stage of NB patients. ( *p* values were obtained using T-test: \*,  $p < 0.05$ ; \*\*,  $p < 0.01$ ; \*\*\*,  $p < 0.001$ )

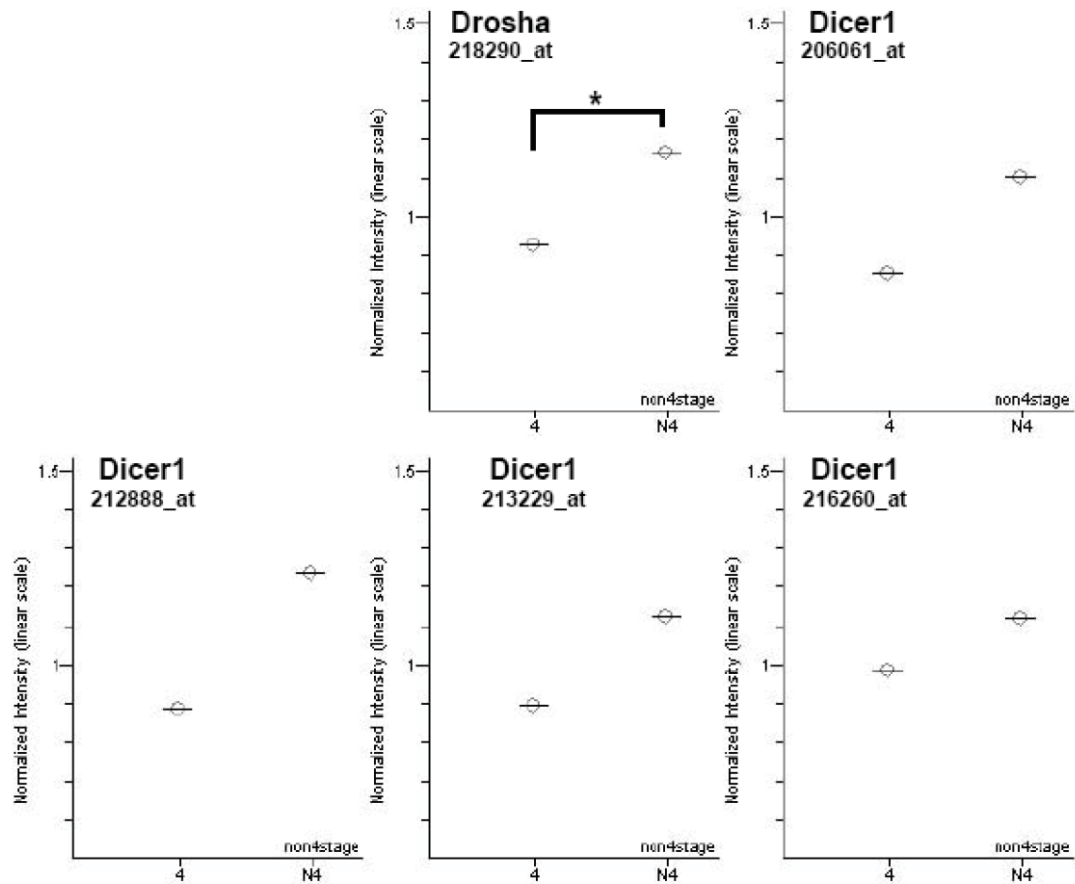

| Gene   | Probe set   | stage 4 (N=20)         | non-stage (N=10)       |
|--------|-------------|------------------------|------------------------|
| Drosha | 218269_at   | 0.925 (0.473 to 1.266) | 1.166 (0.9 to 1.554)   |
| Dicer  | 206061_s at | 0.855 (0.316 to 2.71)  | 1.103 (0.494 to 2.093) |
| Dicer  | 212888_at   | 0.888 (0.355 to 2.134) | 1.237 (0.844 to 1.954) |
| Dicer  | 213229_at   | 0.896 (0.43 to 1.926)  | 1.123 (0.823 to 1.687) |
| Dicer  | 216260_at   | 0.985 (0.565 to 3.201) | 1.121 (0.796 to 1.742) |

**Supplementary Figure S3. Low expressions of Drosha and Dicer in stage 4 neuroblastoma based on the published GSE13136 microarray dataset.** (*Oncogene* 2007 Nov 22;26(53):7432-44). There were four probe sets for Dicer and one set for Drosha. All 5 probe sets exhibited lower expression in stage 4 samples (N =20) than in non-stage 4 samples (N = 10); however, the difference reached statistical significance only in Drosha probe set. Raw data of GSE13136 were processed and analyzed in GeneSpring GX 7.3 software (Agilent Technologies, Palo Alto, CA, USA) by the default normalization setting with an additional perchip normalization to GAPDH control gene. \*,  $p < 0.05$  was established by the default 1-way ANOVA setting.

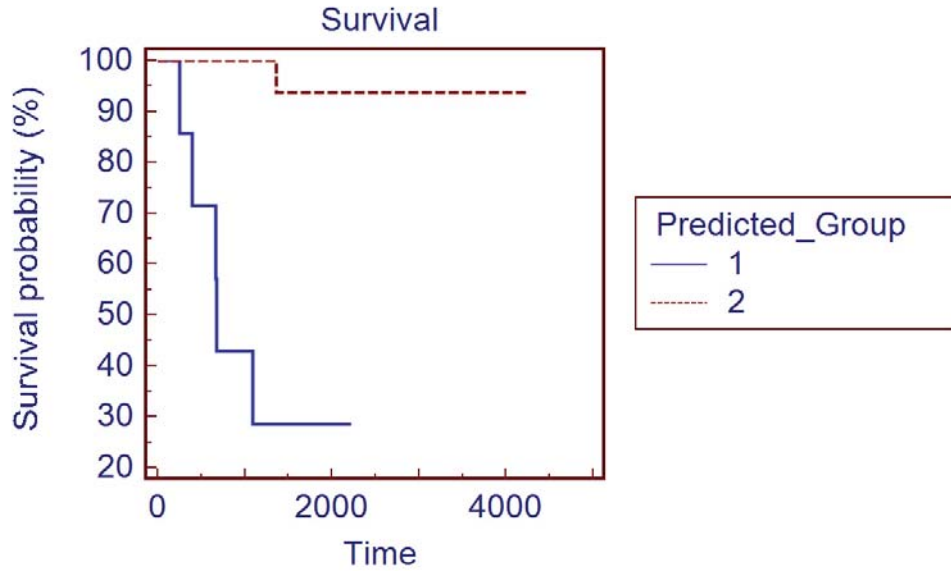

**Supplementary Figure S4. Kaplan-Meier survival curve of predicted outcome in Testing set samples.** This analysis was done by training PNN on the Training Set (38 samples), using the 12 miRs signature, expression of Dicer and Drosha, and age at diagnosis, and then using the trained network to predict the survival status of the 28 Testing Set samples. Using the predicted outcomes, we separated the patients into (dead) group 1 (N=7), and (alive) group 2(N=21) for Kaplan-Meier survival analysis.

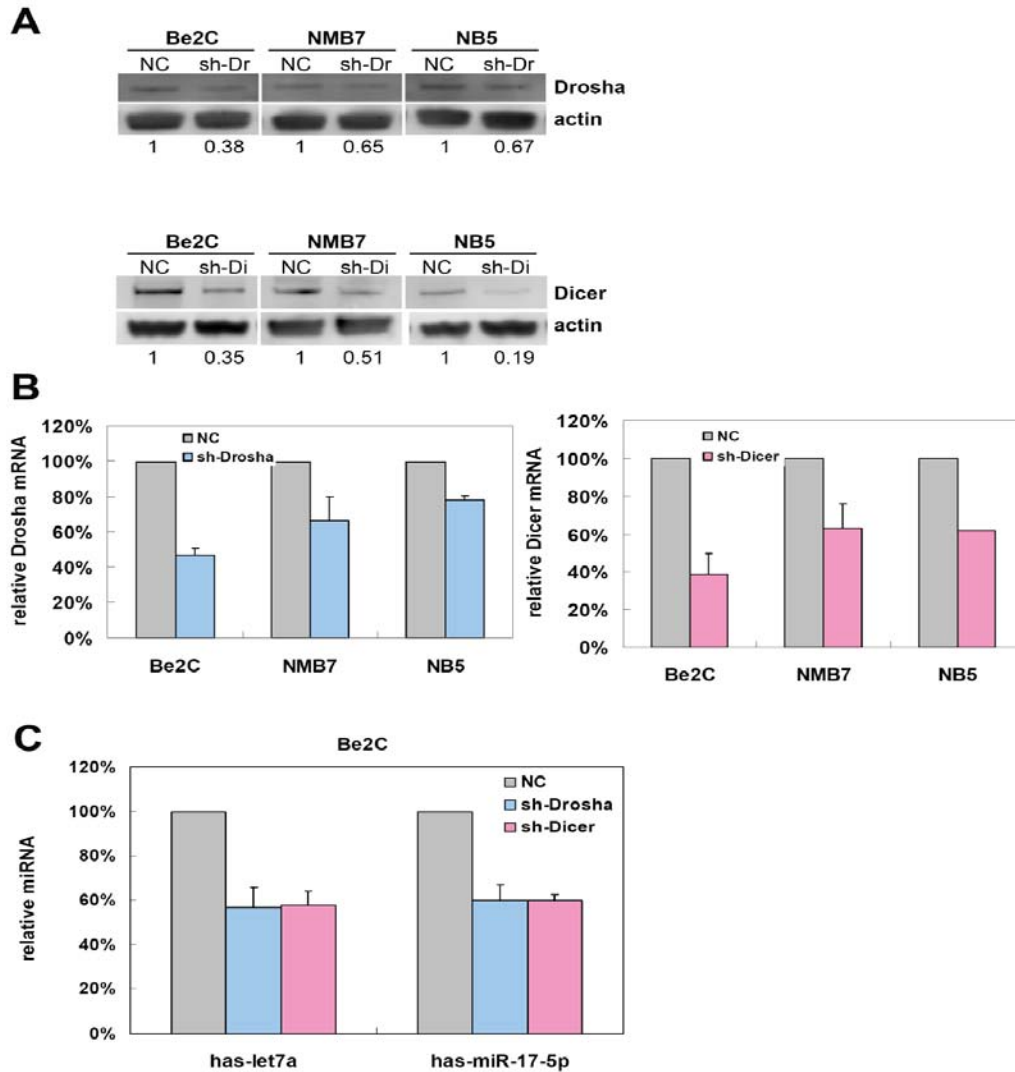

**Supplementary Figure S5. Efficiency of shRNA-mediated Drosha or Dicer knockdown in NB cell lines.** NB cell lines, Be2C, NMB7, and NB5, were transfected with shRNA against Drosha (sh-Dr), Dicer (sh-Di), or luciferase (NC, negative control). (a) Immunoblot analysis of Dicer and Drosha was performed at 72h after transfection. The expression of actin was analyzed as an internal control. Expression levels relative to NC were shown under each lane. (b) q-RT-PCR analyses of Dicer and Drosha at 48h after transfection. Expression levels of Dicer and Drosha were shown as percent relative to luciferase negative control after normalization to GAPDH. Values are mean  $\pm$  s.e.m. (n=3). (c) Downregulation of mature has-let7a and has-miR-17-5p by Dicer and Drosha in Be2C cells 2 day after transfection. Expression levels relative to negative control were shown after normalization to U6. Data shown in (a) and (c) were representatives from three independent experiments.



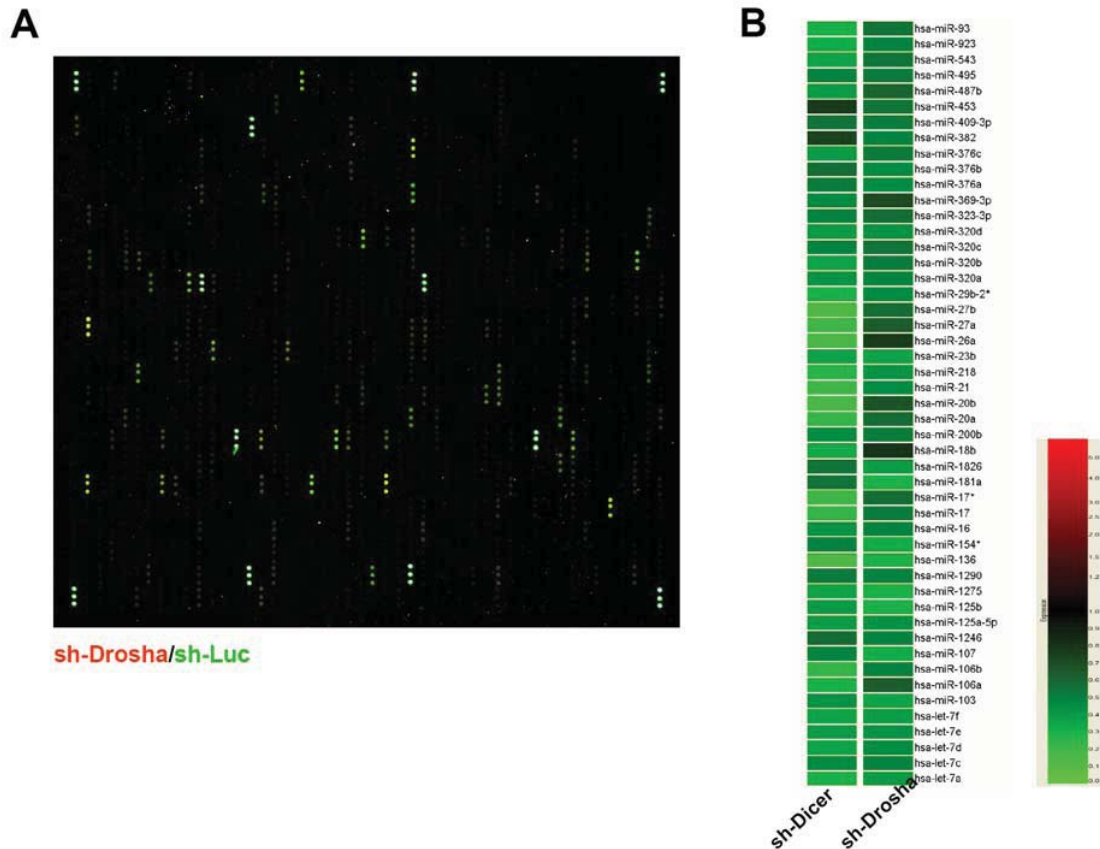

**Supplementary Figure S6. miRNA microarray analysis of miRNA expression in Dicer or Drosha knockdown NB cells.** Comparison of microRNA expression of microRNA extracted from sh-Luc (DY-547, green) and sh-Dicer or sh-Drosha (DY-647, red) of Be2C cells. In brief, 1ug of enriched microRNA per channel was labeled with DY-547 or DY-647 using RNA ligase and hybridized to antisense strand microRNA chips. (a) Representative miRNA array image from sh-Drosha (DY-647)/sh-Luc (DY-547) samples. (b) The normalized data were hierarchically clustered by gene and plotted as a heat map. Red denotes high expression and green denotes low expression relative to the negative control, sh-Luc; only the signal intensity of miRNAs large than 500 in both channel are shown here.

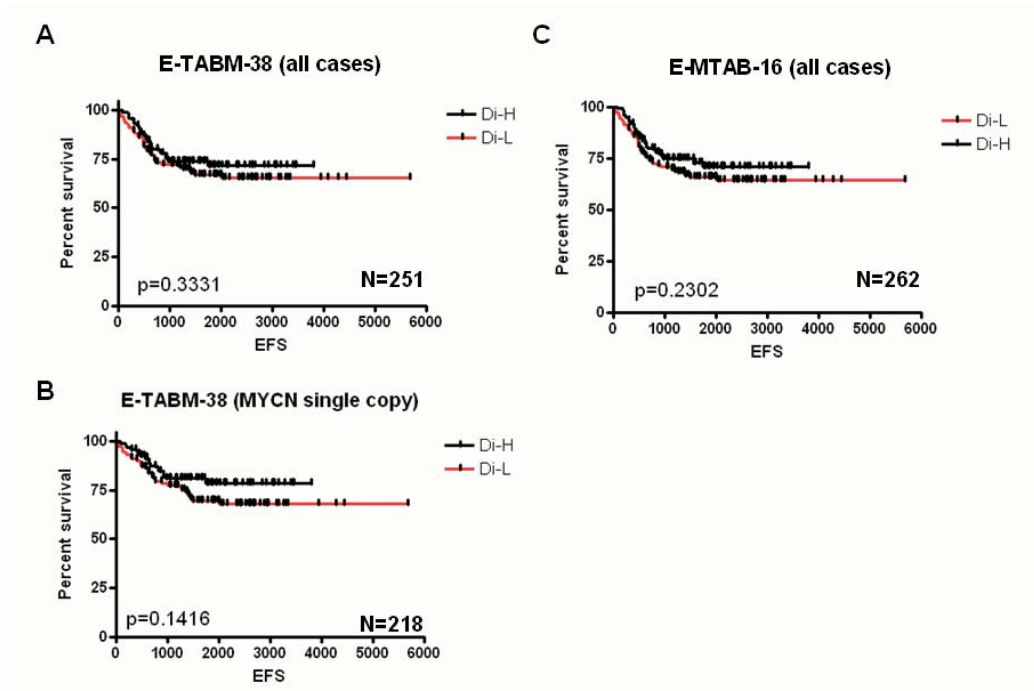

**Supplementary Figure S7.** Kaplan-Meier survival estimates for event-free survival (EFS) of NB were shown according to the expression levels of Dicer in (A) all NB patients or (B) NB patients without MYCN-amplification in E-TABM-38 cohort; (C) all NB patients in E-MTAB-16 cohort. All normalized array data were obtained from ArrayExpress (<http://www.ebi.ac.uk/arrayexpress>). Probe set AL122105 of customized array chip-A-MEXP-255 was used to measure expression of Dicer in both data sets; the analysis was performed by separating the cases from each cohort into High and Low group using the mean expression level of Dicer.
